# Supplementary material for: Karyological study of Ololygon tripui (Lourenço, Nascimento and Pires, 2009), (Anura, Hylidae) with comments on chromosomal traits among populations
Source: Comp Cytogenet. 2016 Oct 10;10(4):505–16. doi: 10.3897/CompCytogen.v10i4.9176 (PMC5240505; doi:10.3897/CompCytogen.v10i4.9176)
Supplement: Supplementary material 1 — Data on chromosomal and fundamental number, chromosomal formulae, C and NOR banding, 18S, and sample locality to all species from the genus Ololygon with some karyotypic study [file CompCytogen-010-505-s001.xlsx]

## Sheet: Plan1
		Species	Locality	2N	CF	NF	C-banding (Position)	NOR/18S	Reference
	O. catharinae group	O. albicans	Petrópolis (RJ)	24	10m + 4sm + 10st	48	Centromeric	6/-	Cardozo et al. 2011
		O. argyreornata	Guarapari (ES)	24	10m + 12sm + 2st	48	-	-/-	Nunes and Fagundes 2009
			Ilha do Cardoso (SP)	24	10m + 12sm + 2st	48	Centromeric	6/-	Cardozo et al. 2011
		O. ariadne	São José do Barreiro (SP)	24	10m + 12sm + 2st	48	Centromeric	6/-	Cardozo et al. 2011
			Missiones (ARG)	24	10m + 12sm + 2st	48	Centromeric	6/-	Cardozo et al. 2011
		O. aromothyella	Trienta y Tres (URU)	24	10m + 12sm + 2st	48	Centromeric and pericentromeric	6/-	Cardozo et al. 2011
		O. berthae	Misiones (ARG)	24	10m + 12sm + 2st	48	Centromeric and pericentromeric	6/-	Cardozo et al. 2011
			Rocha (URU)	24	10m + 12sm + 2st	48	Centromeric and pericentromeric	6/-	Cardozo et al. 2011
			Corrientes (ARG)	24	10m + 12sm + 2st	48	Centromeric and pericentromeric	6/-	Cardozo et al. 2011
			Itirapina (SP)	24	10m + 12sm + 2st	48	Centromeric and pericentromeric	6/-	Cardozo et al. 2011
		O. brieni	Southeastern Brazil	24	-	48	-	-	Bogart 1973
		O. canastrensis	Furnas (MG)	24	12m + 12sm	48	Centromeric and pericentromeric	6, 11/-	Cardozo et al. 2011
		O. catharinae	Southeastern Brazil	24	-	48	-	-/-	Bogart 1973
		O. hiemalis	Jundiaí (SP)	24	10m + 12sm + 2st	48	Centromeric	6/-	Cardozo et al. 2011
		O. littoralis	Ubatuba (SP)	24	10m + 12sm + 2st	48	Centromeric and pericentromeric	6/-	Cardozo et al. 2011
		O. longilinea	Poços de Caldas (MG)	24	10m + 12sm + 2st	48	Centromeric and pericentromeric	6/-	Cardozo et al. 2011
		O. rizibilis	Ribeirão Branco (SP)	24	10m + 12sm + 2st	48	Centromeric	6/-	Cardozo et al. 2011
		O. trapicheiroi	Ubatuba (SP)	24	10m + 12sm + 2st	48	Centromeric	-/-	Cardozo et al. 2011
		O. tripui	Ervália (MG)	24	8m + 10sm + 6st	48	-	6/6	This study
			Muriaé (MG)	24	8m + 10sm + 6st	48	Centromeric and pericentromeric	6/6	This study
			Ouro Preto (MG)	24	8m + 10sm + 6st	48	-	3, 6/3, 4, 6	This study
			Simonésia (MG)	24	8m + 10sm + 6st	48	-	6/6	This study
		Ololygon. sp. (aff. obtriangulata)	São José do Barreiro (SP)	24	10m + 12sm + 2st	48	Centromeric	6/-	Cardozo et al. 2011
	O. perpusilla group	O. arduoa	Santa Teresa (ES)	24	8m + 8sm + 8st	48	Centromeric	6/-	Peixoto et al. 2015
		O. belloni	Castelo (ES)	24	10m + 4sm + 10st	48	Centromeric	6/-	Peixoto et al. 2015
		O. cosenzai	Ervália (ES)	24	8m + 8sm + 8st	48	Centromeric and terminal of any long arms	6/-	Peixoto et al. 2015
		Ololygon sp.	Pocrane (MG)	24	8m + 6sm + 10st	48	Centromeric	6/-	Peixoto et al. 2015
		Ololygon sp.1	Paratí (RJ)	24	10m + 4sm + 10st	48	Centromeric	6/-	Cardozo et al. 2011
		Ololygon sp.2	Ilha do Cardoso (SP)	24	10m + 12sm + 2st	48	Centromeric	6/-	Cardozo et al. 2011
		O. perpusilla	Southeastern Brazil	24	-	48	-	-/-	Bogart 1973
		O. v-signata	São Pedro da Serra (RJ)	24	8m + 6sm + 10st	48	Centromeric	6/-	Peixoto et al. 2015
